# Supplementary material for: Whole Transcriptome Analysis Identifies Platycodin D-Mediated RNA Regulatory Network in Non–Small-Cell Lung Cancer
Source: MDPI journal article supplement (doi:10.3390/cells11152360), 2022-08-01
Supplement: s1 [file s1]

## **SUPPLEMENTARY INFORMATION CAPTION:**

### **Supplementary Table S1**

Divergent primers for DE-circRNAs

### **Supplementary Table S2**

Convergent primers for DE-circRNAs

### **Supplementary Table S3**

Reads of transcripts with annotation and replicates

### **Supplementary Figure S1**

Heatmap of DE-mRNAs between PD treated A549 cells and the control

### **Supplementary Figure S2**

DNA gel electrophoresis of hsa\_circ\_0001326, hsa\_circ\_0005870 and hsa\_circ\_0006990 amplification products

### **Supplementary Figure S3**

Relative expression of DE-lncRNAs in PD treated A549 cells and the control

### **Supplementary Figure S4**

The effect of PD on A549 cell 3D culture

### **Supplementary Data**

**Table S1. Divergent primers for DE-circRNAs**

| Name             | F-primer (5'-3')            | R-primer (5'-3')             |
|------------------|-----------------------------|------------------------------|
| hsa_circ_0001326 | GTTGGTGAAAAGACCA<br>AGGAGAG | GCTTCCTCAAACACAGACT<br>CCTC  |
| hsa_circ_0001946 | CAGTGTCTGCAATATCC<br>AGGGTT | TGGAAGACCTTGAGATTAT<br>TGGAA |
| hsa_circ_0005870 | AGTGGGATCCTCCTACT<br>TGGG   | ACTTGGCTGGGCATAACTC<br>TTC   |
| hsa_circ_0006702 | TTTGAGACTGAAATGGC<br>AGATCA | TCAGCCAATTTCCAAATCG<br>TT    |
| hsa_circ_0006990 | TGGAAAGAGGCAAAAC<br>CTGATG  | CTACATCTGTGAAGGGGCC<br>AAT   |

**Table S2. Convergent primers for DE-circRNAs**

| Name             | F-primer (5'-3')          | R-primer (5'-3')           |
|------------------|---------------------------|----------------------------|
| hsa_circ_0001326 | GTGCTCTTTTGATGGA<br>GAACA | CGGTGGTCCCAGTAGATAA<br>GC  |
| hsa_circ_0001946 | CTTCCAACGTCTCCAGT<br>GTG  | AGTCGCTGGAAGACCCG          |
| hsa_circ_0005870 | GGGAAAGCCCAGGAGA<br>TGATG | ACTATTGTAGTCACTGCTG<br>CGG |
| hsa_circ_0006702 | AAGCCCCAACATTACAG<br>ACCG | GTCCACCATGTTCTCCACT<br>CG  |
| hsa_circ_0006990 | TGGAAGCTGTGTGGAA<br>AGAGG | GCGAGGTGCTGTAGTCTTC<br>AC  |

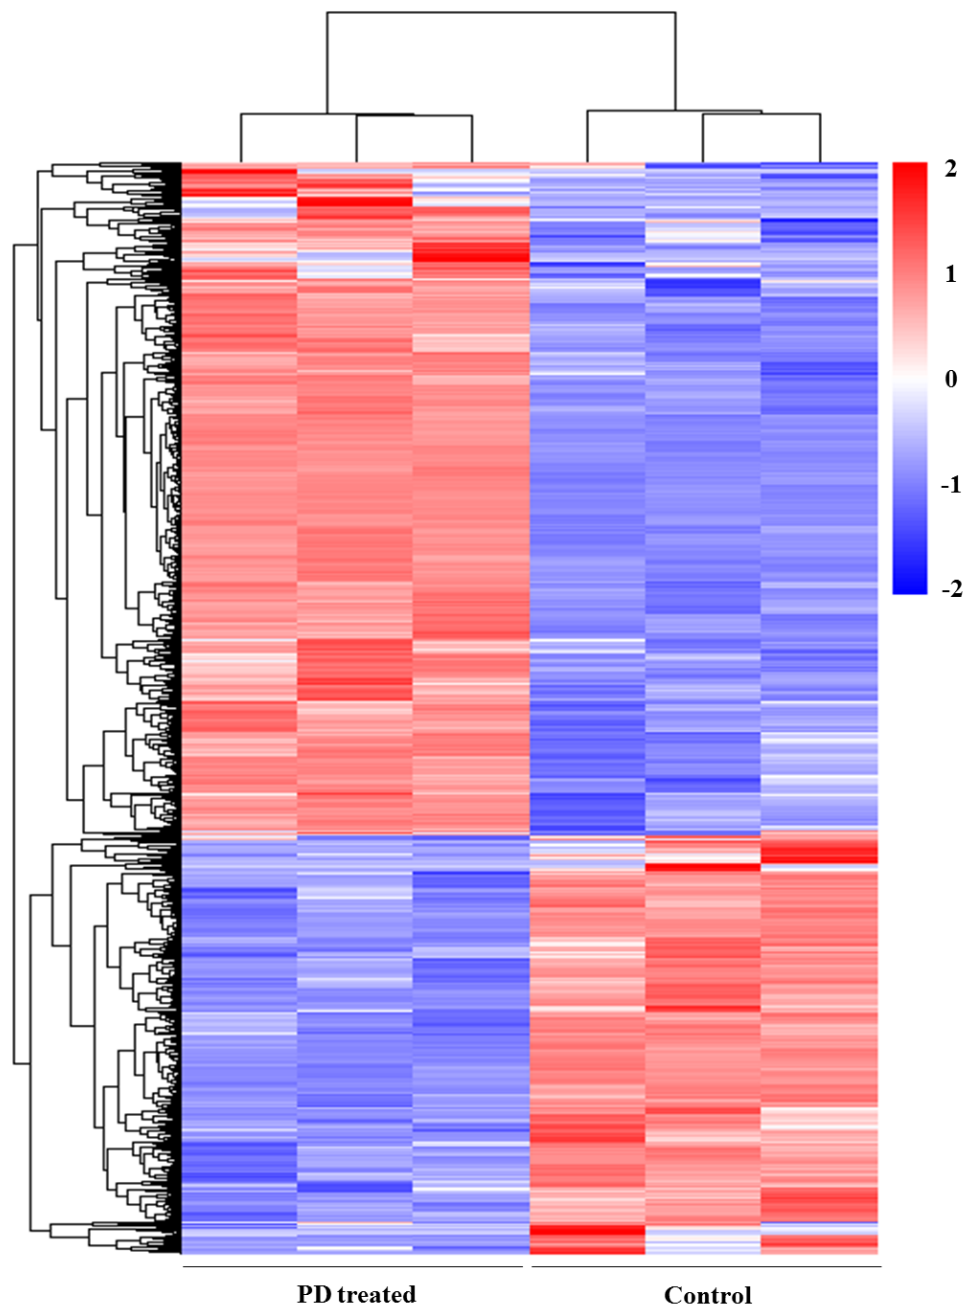

**Figure S1. Heatmap of DE-mRNAs between PD treated A549 cells and the control.** Red indicates upregulation, and blue indicates downregulation ( $p\text{-adj} < 0.05$ ).

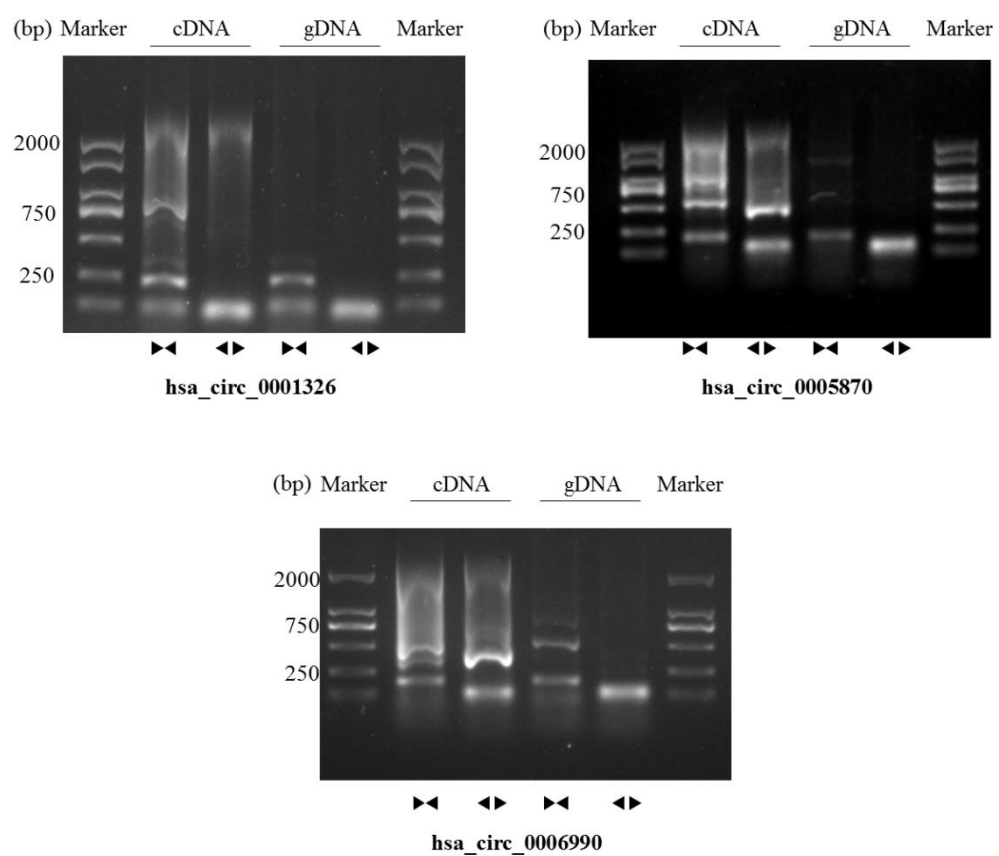

**Figure S2. DNA gel electrophoresis of hsa\_circ\_0001326, hsa\_circ\_0005870 and hsa\_circ\_0006990 amplification products.**

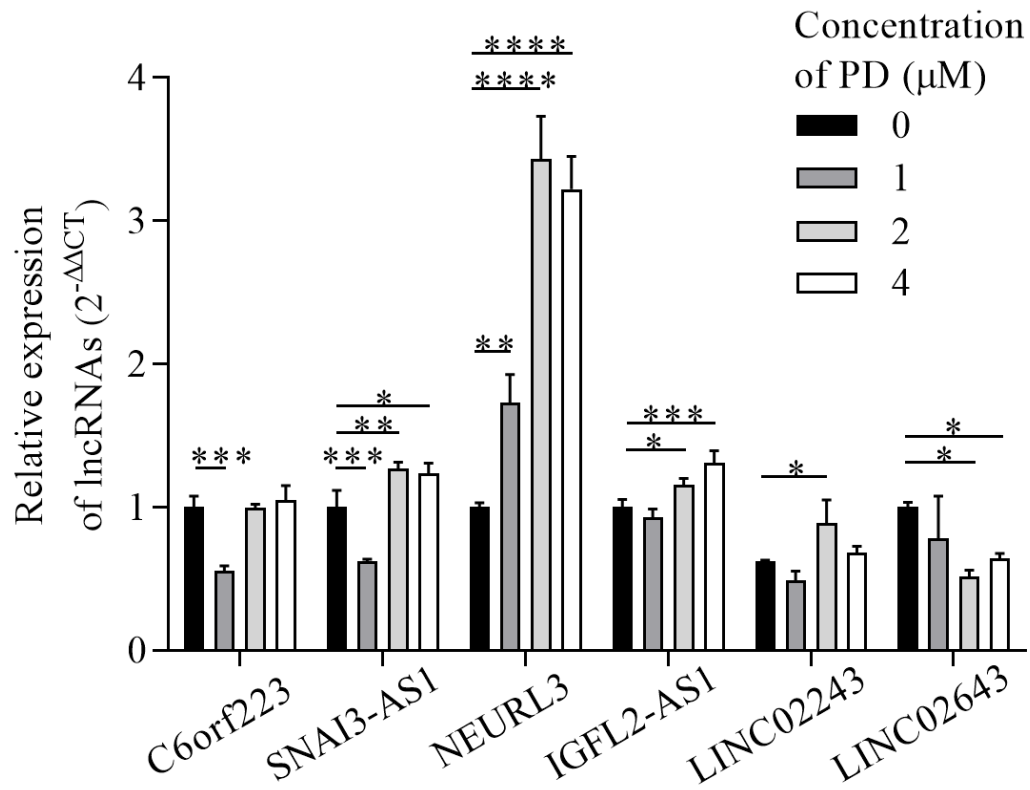

**Figure S3. Relative expression of DE-lncRNAs in PD treated A549 cells and the control.**

U6 is used as internal control. \*  $P < 0.05$ ; \*\*  $P < 0.01$ ; \*\*\*  $P < 0.001$ ; \*\*\*\*  $P < 0.0001$

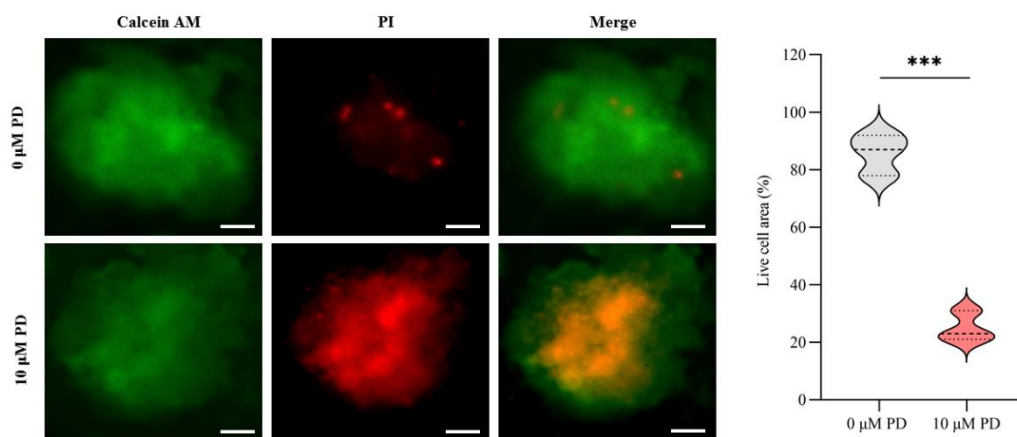

**Figure S4. The effect of PD on A549 cell 3D culture.**

Live cells are stained by Calcein-AM (green color), and dead cells are stained by PI (red color). Scale bar: 100 μm. \*\*\*  $P < 0.001$

## Supplementary Data

Hsa\_circ\_0001946 Sanger sequencing data (5'-3')

>AGTCGCTGGAAGACCCGGAGTTGTTGGAAGACCTTGACACAGGTGCCAT  
CGGAAACCCTGGATATTGCAGACACTGGAAGACCTGAATGTCAGAAGATC  
AGCACACTGGAGACGTTGGAAGACATGGATATTGAGCCAGTTGATGGAAG  
ACTGGGTAGTTGTTGGAAGACATGAAGATGCTGGAAGACACAGAGATGCT  
GGAAGACGTGGAGATGTTGGAAGACGAGCAGATGCTGGAAGCCCTGGAG  
ATGCTGGAAGACCTGGAGATATAGGAAGACATGGATTTGTTGGAAGACGTA  
GCTTAGTTGGAAGACATATATTTTCTGGAAGACGTGGATTTTCTGGAAGAC  
ATGGCTTGTTGGAAGACGTGGATTTTCTGGAAGACGTACCTTTGTTGGA  
GACATACCTTTGTTGGAAGACGTACCTTTGTTGGAAGACGTACCTTTGTTG  
GAAGACACAAGTAGGCTGGAAGACATTAATTTGATGGAAGACATGGCCTT  
GTTGGAAGACGTGGATTTGCTGGAAGACACGGATTCCTGGAAGACCTGG  
ATTTTTCGGAAGCTATGGATTTGAGGGAAGACAAGGATTTTCTGGAAGACA  
TGGATAGTCTGGAAGACATGGCTTTGTTGGAAGACGTGGACTTGCTGGAA  
GACACGGATTTCTGGAAGACCCGGATTTTTTGGGAAGCTATAGATTAAAG  
GAAGACAAGGATTTTCTGGAAGACATGGATAGTCTGGAAGACCTGGAGGC  
CATTGGAAGATGTGGATTTTCTGGAAGACATGGCTTTTTTGGGAAGACGTAG  
ATTTTCAGGAAGACCCAAATTATCCGGAAGACTTGGATTGTTGGGAAGA-  
CGTGGATTTTCTGGAAGACTGGGAGGTTACTGGAAGACATGGATTTTCTGG  
AAGACATGGATTTTCTGGAAGACGTGGATCTTCAGGAAGACATATATTGGC  
TGGAAGACCTGGATTTTTTCCGGAAGATGTGGATTGACTGGAAGACCTGGA  
TTTGGTGGGAAGACGTAGATTTTTTCTGGAAGACACTGACTGACTGGAAGAC  
CTGGATTTCTTTCTGGAAGGCACTGATTGACTGGAAGACCTGGATTTCTTTC  
TGGAAGACACTGATTGACTGGAAGATCTAGATTTTTTCTGGAAGAACTAGAT  
TTACTGGAAGACTTGGATTTGGTGGGAAGACACAGATTTTTTCTGGAAGACAT  
GGATTAGCTGGAAGATCTGTATTTGATGGAAGACCTTGAAATTATTGGAAG  
ACATGGATTTCTGGAAGACGTGGATTTTCTGGAAGATCTGGATTTGGTG  
GAAGACCAGTAATTGCTGGAAGACTGGATTTGCTGGAAGACTTGATTTACT  
GGAAGACTTGGAGCTTCTTGGGAAGACATGGATTGTCCGGAAGACATGGATT  
GTCTGGAAGATGTGGATTTTCTGGAAGCTCAGGATTATCTGGAAGACCTTG  
AGATTATTGGAAGACTTGAAGTCGCTGGAAGACCCGGAGTTGTTGGAAGA  
CCTTGACACAGGTGCCATCGGAAACCCTGGATATTGCAGACACTGGAAGA  
CCTGAATGTCAGAAGATCAGCACACTGGAGACGTTGGAAG

Hsa\_circ\_0006702 Sanger sequencing data (5'-3')

>TTACACTGCAATCGCGTGTGCGCCCTTAAGCCCCAACATTACAGACCGGTG  
GATCCTGTCCTTCATGCAGTCTCTCATTGGCTTCTTTGAGACTGAAATGGCA  
GATCAGACACTCCTCTAATTTACAAAGCAGTGCCCAGCTGGTTTGTGCGAG  
TGGAGAACATGGTGGACCAGCTCCTAAGGAACAATGACCTGTGCTACTGG  
TGAGCAGGTCCCAGAGTTGGTACGAGAAAAACGATTTGGAAATTGGCTGA  
AAGATGCACGTGACTGGACAATTTCCAGAAACAGATACTGGGGCACCCCC

ATCCCACTGTGGGTCAGCGATGACTTTGAGGAGGTGGTATGCATTGGGTCA  
GTGGCGGAACTTGAAGAACTGTCAGGAGCAAAGATCTCAGATCTCCACAG  
AGAGAGTGTTGACCACCTGACCATTCCCTTCACGCTGTGGGAAGGGATCCTT  
GCACCGCATCTCTGAAGTGTTTGACTGTTGGTTTGAGAGTGGCAGCATGCC  
CTATGCTCAGGTTCATTACCCGTTTGAAAACAAGAGGGAGTTTGAGGATGC  
TTTTCTGCAGATTTTCATTGCCGAGGGCATCGACCAAACCAGAGGATGGTT  
TTATACCCTGCTGGTGCTGGCCACGGCCCTCTTTGGACAACCGCCTTTCAA  
GAACGTAATTGTGAATGGGCTTGTCCTGGCAAGTGATGGCCAAAAAATGAG  
CAAACGGAAAAAGAATTATCCAGATCCAGTTTCCATCATCCAGAAGTATGG  
TGCTGATGCCCTCAGATTATATCTGATTAACCTCCCCTGTGGTGAGAGCAGAA  
AACCTCCGCTTTAAAGAAGAGGGTGTGCGGGACGTCCTTAAGGATGTACTG  
CTCCCATGGTACAATGCCTATCGCTTCTTAATCCAGAACGTTCTGAGGCTCC  
AGAAGGAGGAAGAAATAGAATTTCTCTACAATGAGAACACGGTTAGAGAA  
AGCCCCAACATTACAGACCGGTGGATCCTGTCCTTCATGCAGTCTCTCATTG  
GCTTCTTTGAGACTGAAATGGCAGATCAGACACTCCTCTAATTTACAAAGC  
AGTGCCCAGCTGGTTTGTGCGAGTGGAGAACATGGTGGACAAGGGCGACA  
CGCGAT
